# Supplementary material
Source: bioRxiv or medRxiv preprint supplement (https://medrxiv.org/highwire/filestream/74063/field_highwire_adjunct_files/1/2020.03.16.20036590-2.pdf)
Supplement: Supplementary file [file 2020.03.16.20036590-2.pdf]

|    | Trial name  | Actual Study Start Date | Actual Primary Completion Date | Actual Study Completion Date | Published date | Months to Publication | TRIAL REGISTRY LINK                                                                                                               | PAPER LINK                                                                                                                                                                            |
|----|-------------|-------------------------|--------------------------------|------------------------------|----------------|-----------------------|-----------------------------------------------------------------------------------------------------------------------------------|---------------------------------------------------------------------------------------------------------------------------------------------------------------------------------------|
| 1  | C-SURFER    | 17-Mar-14               | 11-Mar-15                      | 2-Sep-15                     | 17-Oct-15      | 1                     | <a href="https://clinicaltrials.gov/ct2/show/NCT02092350">https://clinicaltrials.gov/ct2/show/NCT02092350</a>                     | <a href="https://www.thelancet.com/journals/lancet/article/PIIS0140-6736(15)00349-9/fulltext">https://www.thelancet.com/journals/lancet/article/PIIS0140-6736(15)00349-9/fulltext</a> |
| 2  | PATHWAY-2   | 1-May-09                | 1-Jul-15                       | 1-Aug-15                     | 20-Sep-15      | 2                     | <a href="https://clinicaltrials.gov/ct2/show/NCT02369081">https://clinicaltrials.gov/ct2/show/NCT02369081</a>                     | <a href="https://www.thelancet.com/journals/lancet/article/PIIS0140-6736(15)00257-3/fulltext">https://www.thelancet.com/journals/lancet/article/PIIS0140-6736(15)00257-3/fulltext</a> |
| 3  | PRESERVE    | 7-Oct-13                | 29-Sep-17                      | 17-Oct-17                    | 15-Feb-18      | 3                     | <a href="https://clinicaltrials.gov/ct2/show/NCT01467466">https://clinicaltrials.gov/ct2/show/NCT01467466</a>                     | <a href="https://www.nejm.org/doi/full/10.1056/NEJMoa1710933">https://www.nejm.org/doi/full/10.1056/NEJMoa1710933</a>                                                                 |
| 4  | SPRINT      | 1-Oct-10                | 1-Jul-16                       | Stopped early:<br>20-Aug-15  | 26-Nov-15      | 3                     | <a href="https://clinicaltrials.gov/ct2/show/NCT01206062">https://clinicaltrials.gov/ct2/show/NCT01206062</a>                     | <a href="https://www.nejm.org/doi/full/10.1056/NEJMoa1511939">https://www.nejm.org/doi/full/10.1056/NEJMoa1511939</a>                                                                 |
| 5  | CORAL       | 1-Apr-04                | 1-Sep-13                       | 1-Sep-13                     | 2-Jan-14       | 4                     | <a href="https://clinicaltrials.gov/ct2/show/NCT00081731">https://clinicaltrials.gov/ct2/show/NCT00081731</a>                     | <a href="https://www.nejm.org/doi/full/10.1056/NEJMoa1310753">https://www.nejm.org/doi/full/10.1056/NEJMoa1310753</a>                                                                 |
| 6  | AKIKI       | 1-Sep-13                | 1-Feb-16                       | 1-Feb-16                     | 14-Jul-16      | 5                     | <a href="https://clinicaltrials.gov/ct2/show/NCT01932190">https://clinicaltrials.gov/ct2/show/NCT01932190</a>                     | <a href="https://www.nejm.org/doi/full/10.1056/NEJMoa1603017">https://www.nejm.org/doi/full/10.1056/NEJMoa1603017</a>                                                                 |
| 7  | RAVE        | 1-Jan-05                | 1-Dec-08                       | 1-Jan-10                     | 15-Jul-10      | 6                     | <a href="https://clinicaltrials.gov/ct2/show/NCT00104299?term=rave">https://clinicaltrials.gov/ct2/show/NCT00104299?term=rave</a> | <a href="https://www.nejm.org/doi/full/10.1056/NEJMoa0909905">https://www.nejm.org/doi/full/10.1056/NEJMoa0909905</a>                                                                 |
| 8  | REPRISE     | 1-May-14                | 18-Apr-17                      | 18-Apr-17                    | 16-Nov-17      | 6                     | <a href="https://clinicaltrials.gov/ct2/show/NCT02160145">https://clinicaltrials.gov/ct2/show/NCT02160145</a>                     | <a href="https://www.nejm.org/doi/full/10.1056/NEJMoa1710030">https://www.nejm.org/doi/full/10.1056/NEJMoa1710030</a>                                                                 |
| 9  | HALTPKD     | 1-Jan-06                | 1-Jun-14                       | 1-Jun-14                     | 11-Dec-14      | 6                     | <a href="https://clinicaltrials.gov/ct2/show/NCT00283686">https://clinicaltrials.gov/ct2/show/NCT00283686</a>                     | <a href="https://www.nejm.org/doi/full/10.1056/NEJMoa1402685">https://www.nejm.org/doi/full/10.1056/NEJMoa1402685</a>                                                                 |
| 10 | EMPAREG     | 1-Jul-10                | 1-Apr-15                       | 1-Apr-15                     | 26-Nov-15      | 7                     | <a href="https://clinicaltrials.gov/ct2/show/NCT01131676">https://clinicaltrials.gov/ct2/show/NCT01131676</a>                     | <a href="https://www.nejm.org/doi/full/10.1056/NEJMoa1504720">https://www.nejm.org/doi/full/10.1056/NEJMoa1504720</a>                                                                 |
| 11 | CREDESCENCE | 1-Feb-14                | 30-Oct-18                      | 30-Oct-18                    | 13-Jun-19      | 7                     | <a href="https://clinicaltrials.gov/ct2/show/NCT02065791">https://clinicaltrials.gov/ct2/show/NCT02065791</a>                     | <a href="https://www.nejm.org/doi/full/10.1056/NEJMoa1811744">https://www.nejm.org/doi/full/10.1056/NEJMoa1811744</a>                                                                 |
| 12 | SALT-ED     | 1-Jan-16                | 30-Jun-17                      | 30-Jun-17                    | 1-Mar-18       | 8                     | <a href="https://clinicaltrials.gov/ct2/show/NCT02614040">https://clinicaltrials.gov/ct2/show/NCT02614040</a>                     | <a href="https://www.nejm.org/doi/full/10.1056/NEJMoa1711586">https://www.nejm.org/doi/full/10.1056/NEJMoa1711586</a>                                                                 |
| 13 | BICARICU    | 5-May-15                | 15-Sep-17                      | 13-Oct-17                    | 7-Jul-18       | 9                     | <a href="https://clinicaltrials.gov/ct2/show/NCT02476253">https://clinicaltrials.gov/ct2/show/NCT02476253</a>                     | <a href="https://www.thelancet.com/journals/lancet/article/PIIS0140-6736(18)31080-8/fulltext">https://www.thelancet.com/journals/lancet/article/PIIS0140-6736(18)31080-8/fulltext</a> |
| 14 | AMBER       | 23-Jan-17               | 27-Nov-18                      | 27-Nov-18                    | 15-Sep-19      | 9                     | <a href="https://clinicaltrials.gov/ct2/show/NCT03071263">https://clinicaltrials.gov/ct2/show/NCT03071263</a>                     | <a href="https://www.thelancet.com/journals/lancet/article/PIIS0140-6736(19)32135-X/fulltext">https://www.thelancet.com/journals/lancet/article/PIIS0140-6736(19)32135-X/fulltext</a> |
| 15 | SALT        | 1-Apr-03                | 1-Feb-06                       | 1-Feb-06                     | 16-Nov-06      | 9                     | <a href="https://clinicaltrials.gov/ct2/show/NCT00072683">https://clinicaltrials.gov/ct2/show/NCT00072683</a>                     | <a href="https://www.nejm.org/doi/full/10.1056/nejmoa065181">https://www.nejm.org/doi/full/10.1056/nejmoa065181</a>                                                                   |
| 16 | AMACING     | 1-Apr-14                | 1-Jul-16                       | 1-Aug-17                     | 1-Apr-17       | 9                     | <a href="https://clinicaltrials.gov/ct2/show/NCT02106234">https://clinicaltrials.gov/ct2/show/NCT02106234</a>                     | <a href="https://www.thelancet.com/journals/lancet/article/PIIS0140-6736(17)30057-0/fulltext">https://www.thelancet.com/journals/lancet/article/PIIS0140-6736(17)30057-0/fulltext</a> |

|    |              |           |           |                            |           |    |                                                                                                               |                                                                                                                                                                                               |
|----|--------------|-----------|-----------|----------------------------|-----------|----|---------------------------------------------------------------------------------------------------------------|-----------------------------------------------------------------------------------------------------------------------------------------------------------------------------------------------|
| 17 | SHARP        | 1-Jun-03  | 1-Aug-10  | 1-Aug-10                   | 25-Jun-11 | 10 | <a href="https://clinicaltrials.gov/ct2/show/NCT00125593">https://clinicaltrials.gov/ct2/show/NCT00125593</a> | <a href="https://www.thelancet.com/journals/lancet/article/PIIS0140-6736%2811%2960739-3/fulltext">https://www.thelancet.com/journals/lancet/article/PIIS0140-6736%2811%2960739-3/fulltext</a> |
| 18 | VA NEPHRON-D | 1-Jul-08  | 1-Sep-14  | Stopped early:<br>1-Jan-13 | 09-Nov-13 | 10 | <a href="https://clinicaltrials.gov/ct2/show/NCT00555217">https://clinicaltrials.gov/ct2/show/NCT00555217</a> | <a href="https://www.nejm.org/doi/full/10.1056/nejmoa1303154">https://www.nejm.org/doi/full/10.1056/nejmoa1303154</a>                                                                         |
| 19 | STOP-IgAN    | 1-Feb-08  | 1-Feb-15  | 1-Feb-15                   | 3-Dec-15  | 10 | <a href="https://clinicaltrials.gov/ct2/show/NCT00554502">https://clinicaltrials.gov/ct2/show/NCT00554502</a> | <a href="https://www.nejm.org/doi/full/10.1056/NEJMoa1415463">https://www.nejm.org/doi/full/10.1056/NEJMoa1415463</a>                                                                         |
| 20 | DIPAK        | 1-Jun-12  | 1-Aug-17  | 1-Dec-17                   | 20-Nov-18 | 11 | <a href="https://clinicaltrials.gov/ct2/show/NCT01616927">https://clinicaltrials.gov/ct2/show/NCT01616927</a> | <a href="https://jamanetwork.com/journals/jama/fullarticle/2710504">https://jamanetwork.com/journals/jama/fullarticle/2710504</a>                                                             |
| 21 | TEMPO 3:4    | 1-Jan-07  | 1-Jan-12  | 1-Jan-12                   | 20-Dec-12 | 11 | <a href="https://clinicaltrials.gov/ct2/show/NCT00428948">https://clinicaltrials.gov/ct2/show/NCT00428948</a> | <a href="https://www.nejm.org/doi/full/10.1056/NEJMoa1205511">https://www.nejm.org/doi/full/10.1056/NEJMoa1205511</a>                                                                         |
| 22 | SONAR        | 17-May-13 | 29-Mar-18 | 29-Mar-18                  | 14-Apr-19 | 12 | <a href="https://clinicaltrials.gov/ct2/show/NCT01858532">https://clinicaltrials.gov/ct2/show/NCT01858532</a> | <a href="https://www.thelancet.com/article/S0140-6736(19)30772-X/fulltext">https://www.thelancet.com/article/S0140-6736(19)30772-X/fulltext</a>                                               |
| 23 | SYMPHONY     | 1-Nov-02  | 1-May-06  | 1-Feb-08                   | 20-Dec-07 | 19 | <a href="https://clinicaltrials.gov/ct2/show/NCT00231764">https://clinicaltrials.gov/ct2/show/NCT00231764</a> | <a href="https://www.nejm.org/doi/full/10.1056/NEJMoa067411">https://www.nejm.org/doi/full/10.1056/NEJMoa067411</a>                                                                           |
| 24 | MENTOR       | 1-Nov-11  | 1-Oct-17  | 1-Oct-17                   | 4-Jul-19  | 21 | <a href="https://clinicaltrials.gov/ct2/show/NCT01180036">https://clinicaltrials.gov/ct2/show/NCT01180036</a> | <a href="https://www.nejm.org/doi/full/10.1056/NEJMoa1814427">https://www.nejm.org/doi/full/10.1056/NEJMoa1814427</a>                                                                         |
| 25 | IDEAL-ICU    | 1-Jul-12  | 1-Oct-16  | 1-Oct-16                   | 11-Oct-18 | 24 | <a href="https://clinicaltrials.gov/ct2/show/NCT01682590">https://clinicaltrials.gov/ct2/show/NCT01682590</a> | <a href="https://www.nejm.org/doi/full/10.1056/NEJMoa1803213">https://www.nejm.org/doi/full/10.1056/NEJMoa1803213</a>                                                                         |
| 26 | PEXIVAS      | 1-May-10  | 1-Aug-17  | 1-Aug-17                   | 13-Feb-20 | 30 | <a href="https://clinicaltrials.gov/ct2/show/NCT00987389">https://clinicaltrials.gov/ct2/show/NCT00987389</a> | <a href="https://www.nejm.org/doi/full/10.1056/NEJMoa1803537">https://www.nejm.org/doi/full/10.1056/NEJMoa1803537</a>                                                                         |
| 27 | RITUXVAS     | 11-Jan-05 | 11-Jan-08 | 11-Jan-08                  | 15-Jul-10 | 30 | <a href="http://www.isrctn.com/ISRCTN28528813">http://www.isrctn.com/ISRCTN28528813</a>                       | <a href="https://www.nejm.org/doi/full/10.1056/NEJMoa0909169">https://www.nejm.org/doi/full/10.1056/NEJMoa0909169</a>                                                                         |

**Trials with incomplete or missing data**

|   |                                           |            |            |            |                   |         |                                                                                                                                                                               |                                                                                                                                   |
|---|-------------------------------------------|------------|------------|------------|-------------------|---------|-------------------------------------------------------------------------------------------------------------------------------------------------------------------------------|-----------------------------------------------------------------------------------------------------------------------------------|
| 1 | ELAIN                                     | 2-Aug-13   | not listed | not listed | 24-May-16         | unknown | <a href="https://www.drks.de/drks_web/navigate.do?navigationId=trial.HTML&amp;TRIAL_ID=D">https://www.drks.de/drks_web/navigate.do?navigationId=trial.HTML&amp;TRIAL_ID=D</a> | <a href="https://jamanetwork.com/journals/jama/fullarticle/2522434">https://jamanetwork.com/journals/jama/fullarticle/2522434</a> |
| 2 | PIVOTAL                                   | 6-Sep-13   | not listed | not listed | 31-Jan-19         | unknown | <a href="https://www.clinicaltrialsregister.eu/ctr-search/search?query=2013-002267-25">https://www.clinicaltrialsregister.eu/ctr-search/search?query=2013-002267-25</a>       | <a href="https://www.nejm.org/doi/full/10.1056/NEJMoa1810742">https://www.nejm.org/doi/full/10.1056/NEJMoa1810742</a>             |
| 3 | 4D (Die Deutsche Diabetes Dialyse Studie) | not listed | not listed | not listed | 21-Jul-05         | unknown | none                                                                                                                                                                          | <a href="https://www.nejm.org/doi/full/10.1056/nejmoa043545">https://www.nejm.org/doi/full/10.1056/nejmoa043545</a>               |
| 4 | ISCHEMIA-CKD                              | 1-Jan-14   | 1-Jun-19   | 1-Jul-20   | not yet published | unknown | <a href="https://clinicaltrials.gov/ct2/show/NCT01985360">https://clinicaltrials.gov/ct2/show/NCT01985360</a>                                                                 | <a href="https://www.ischemiatrial.org/ischemia-study-results#ckd">https://www.ischemiatrial.org/ischemia-study-results#ckd</a>   |
